# Supplementary material
Source: PubMed Central journal article supplement (PMC4375027)
Supplement: NIHMS666701-supplement.pdf [file NIHMS666701-supplement.pdf]

## **Inventory of Supplemental Items**

**Figure S1. Notum has minimal effects on the GPI anchor of GPC3 or GPC4.** Related to Figure 1. This figure provides additional data to support Figure 1. Appear after Figure 1.

**Figure S2. Characterization of Notum-TM, comparison of Notum and Tiki2, and the effect of Notum on Wnt5a.** Related to Figures 2 and 3. This figure provides additional data to support Figure 2 and 3. Appear after Figure 2.

**Figure S3. Evolutionary conservation of Notum proteins from human, mouse, frog, fish, fly and planarian.** Related to Figure 4. This figure provides complete amino acid sequence information of *Xenopus laevis* Notum and Notum2 proteins and their homology relationship to Notum proteins from other species, supporting Figure 4. Appear before Figure 4.

**Figure S4. Characterization of *Xenopus laevis* Notum and Notum'.** Related to Figure 5. This figure provides additional data demonstrating that *Xenopus laevis* Notum and Notum' behave like mouse Notum and inhibit Wnt signaling through Wnt deacylation. Appear before Figure 5.

**Figure S5. Notum depletion reduces head development and anterior neural marker expression but does not affect Organizer marker expression.** Related to Figure 5.

This figure provides additional data supporting that Notum is required for anterior development without affecting Organizer formation. Appear after Figure 5.

**Figure S6. Notum is required for neural induction by Noggin, but is not required for Noggin or Chordin to antagonize BMP signaling.** Related to Figure 6. This figure provides additional data supporting that Notum is required for neural induction. Appear after Figure 6.

**Table S1. Statistics for Figure 5F.**

**Table S2. Statistics for Figure S5D.** Related to Figure 5.

**Table S3. Statistics for Figure S5F.** Related to Figure 5.

**Table S4. Statistics for Figure 6A.**

Figure S1

A

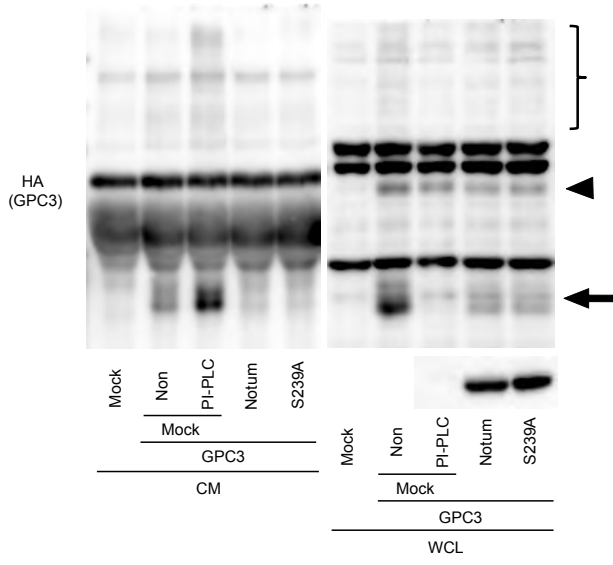

B

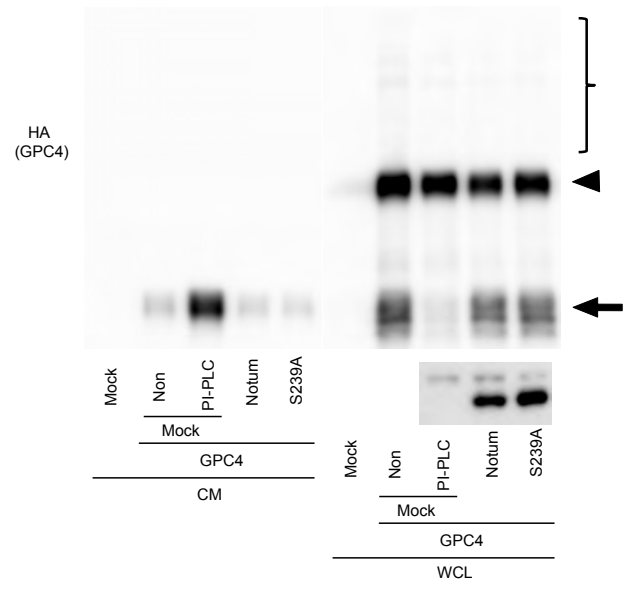

Figure S2

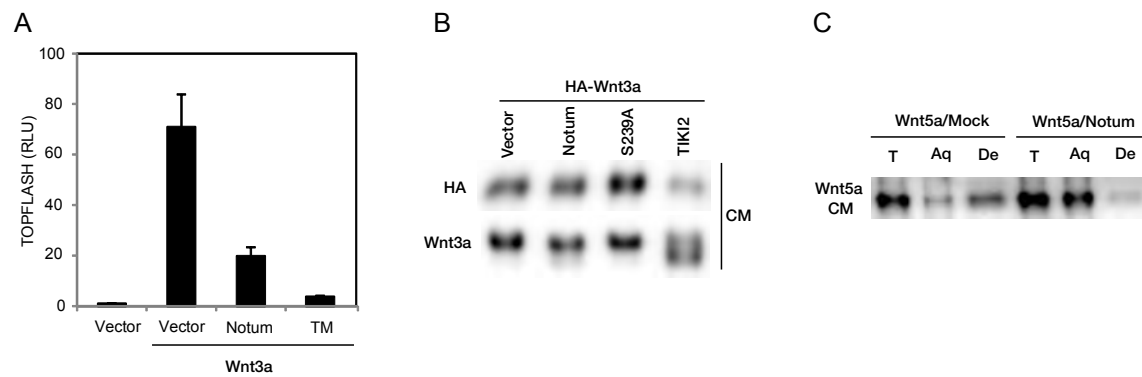



Figure S3

A

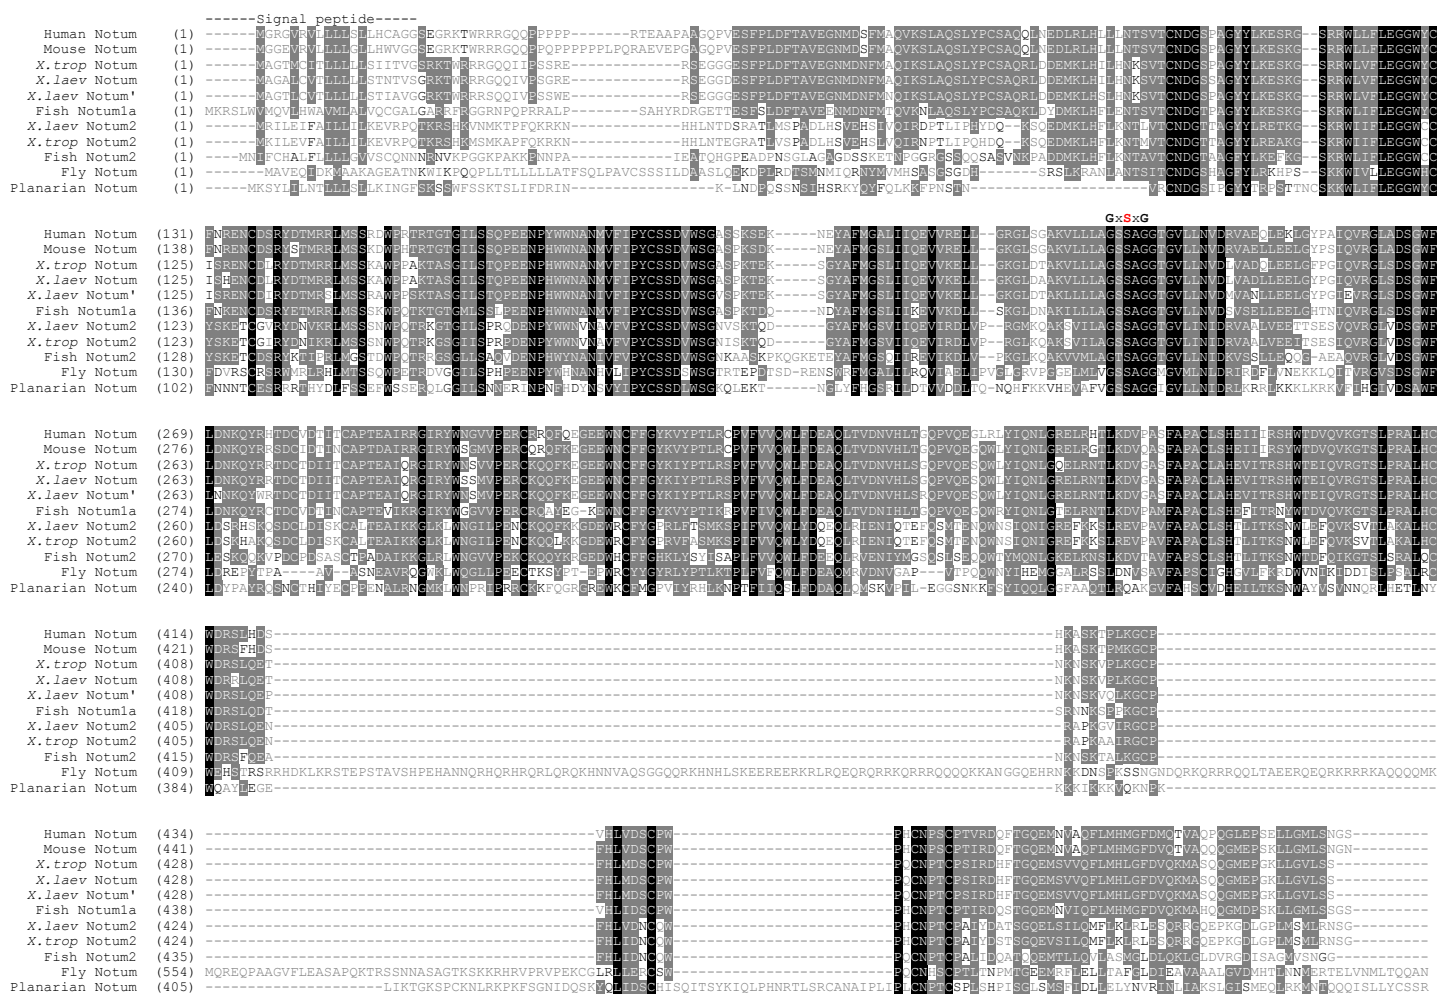

B

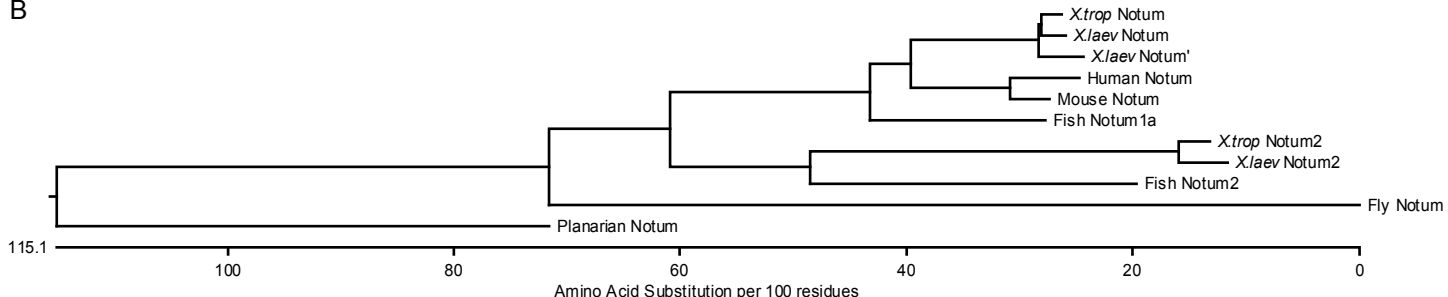

Figure S4

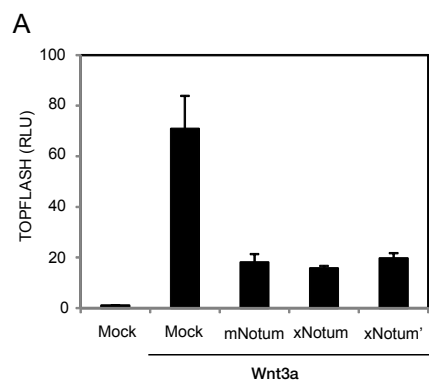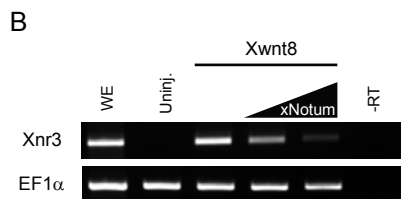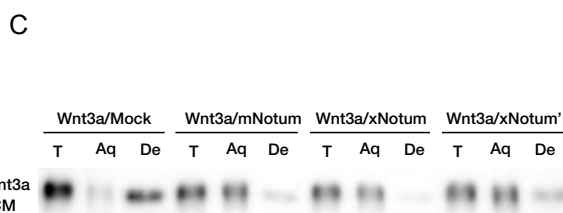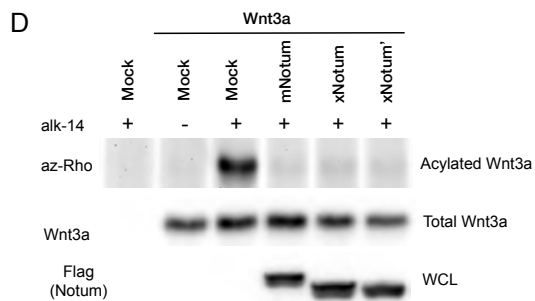

Figure S5

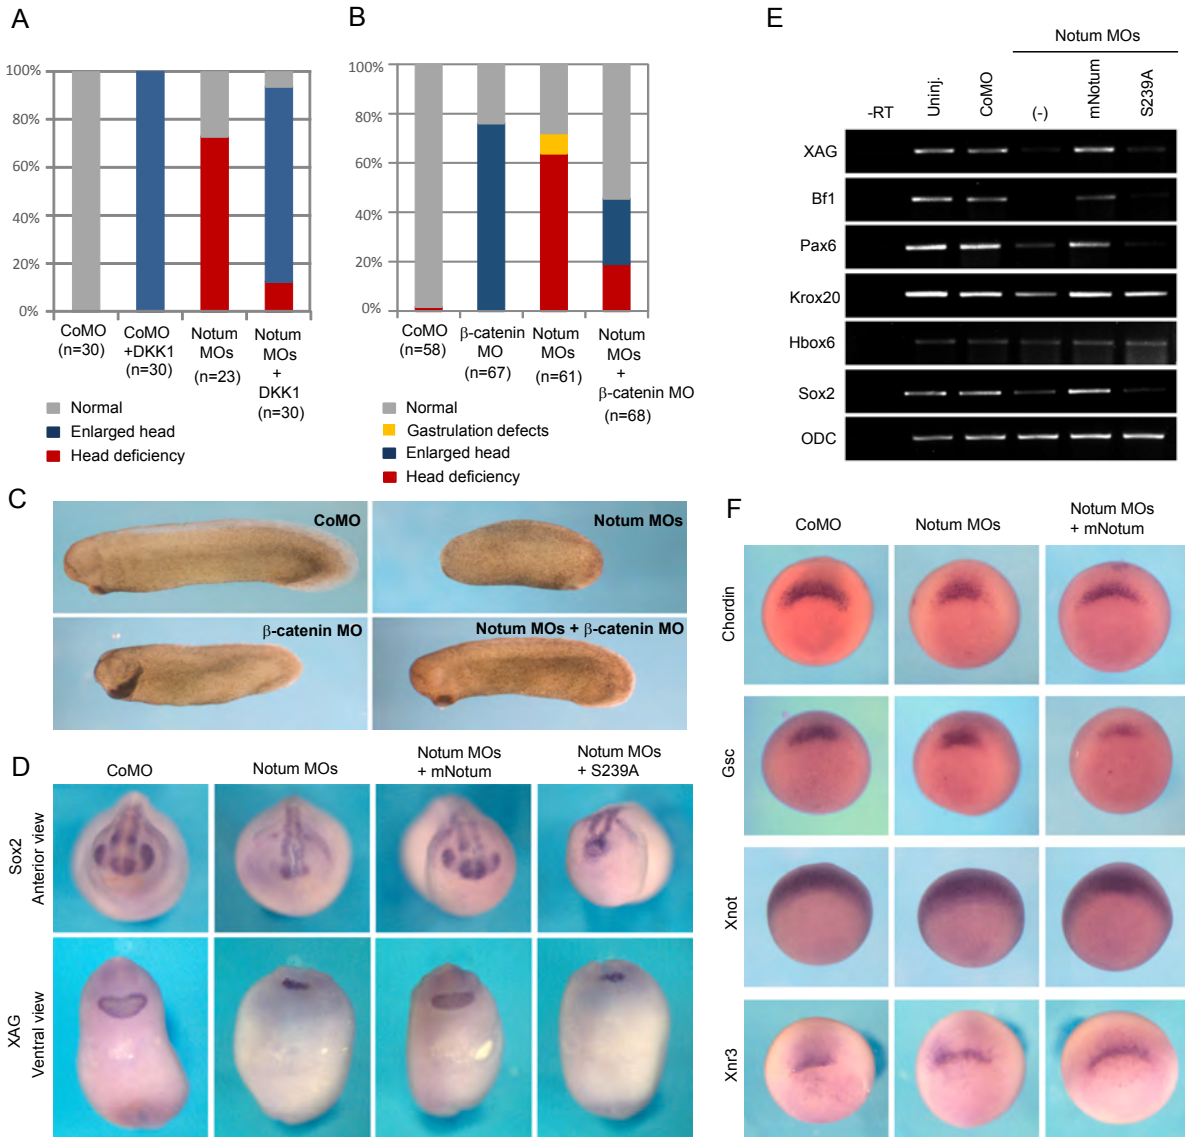



## SUPPLEMENTAL FIGURE LEGENDS

### **Figure S1. Notum has minimal effects on the GPI anchor of GPC3 or GPC4.**

#### **Related to Figure 1.**

*HA-GPC3* (A) or *HA-GPC4* (B) was expressed alone or with *Notum* or *Notum(S239A)* and resulting CM and WCL were analyzed. PI-PLC was added to the culture medium 20 minutes before collecting CM and WCL and used as a positive control. PI-PLC efficiently cleaved the GPI anchor, releasing GPC3 and GPC4 into CM while depleting them from WCL. *Notum* or *Notum(S239A)* had little effects on the release of GPC3 or GPC4 into CM (the protein band indicated by the arrow) when compared to PI-PLC. Glypicans have complex biosynthetic processes and are subjected to an endoproteolytic cleavage before being transported to the cell surface and the resulting two fragments remain attached to each other by disulfide bonds (De Cat et al., 2003; Filmus et al., 2008). The arrowhead indicates the un-cleaved protein core of GPC3 or GPC4 (WCL), while the arrow indicates one of the two cleaved protein fragments recognized by the HA antibody (WCL and CM) as GPC3 and GPC4 are tagged by HA at the matured amino-terminus. The broad bracket indicates glycanated but uncleaved protein species whose signals were weak: most of the mature glycanated species were cleaved but the HA tagged amino-terminal fragment was not glycanated (De Cat et al., 2003). The remaining bands in (A) were cross-reactive species: the HA tag on GPC3 is a shorter form (YDVPDYA) that was only detectable using the 12CA5 anti-HA monoclonal antibody with a higher background (Gonzalez et al., 1998). These patterns of GPC3 and GPC4 immunoblotting were identical to those described in literature (e.g., Capurro et al., 2014). The cleaved GPC3 band (arrow) in WCL was reduced by either *Notum* or *Notum(S239A)* co-expression (A), and thus this reduction likely represented a hydrolase-independent and non-specific phenomenon during GPC3 biogenesis under the overexpression condition.

**Figure S2. Characterization of Notum-TM, comparison of Notum and Tiki2, and the effect of Notum on Wnt5a. Related to Figures 2 and 3.**

(A) Expression of either *Notum-TM* or *Notum* inhibited *Wnt3a*-induced TOPFLASH. Error bars represent SD of triplicated experiments. Notum-TM was more potent than Notum in this assay, while the converse was observed in Figure 2C. These differences were reproducible, and might be explained by differences of the two experimental conditions. Under the condition of this figure Notum-TM was tethered to and concentrated on the cell surface, possibly making it more effective in inactivating Wnt3a near the plasma membrane (where signaling occurs) than Notum, which was diffusible in the CM. On the other hand, under the condition of Figure 2C, Wnt3a CM taken from Notum-expressing cells contained Notum, which likely continued to exert its action after the Wnt3a CM was harvested and applied to responding cells for the duration of the TOPFLASH assay. However Wnt3a CM taken from Notum-TM-expressing cells did not contained Notum (i.e., Notum-TM), and inactivation of Wnt3a ceased when the CM was harvested, potentially explaining the difference.

(B) Notum did not cleave the amino terminal HA tag of HA-Wnt3a, while TIKI2 did. Note that Wnt3a mobility alteration by Notum was much more subtle than that by Tiki2.

(C) Coexpression of *Wnt5a* and *Notum* resulted in loss of hydrophobicity of the secreted Wnt5a protein, as shown by the Triton X-114 detergent-aqueous phase separation assay, suggesting that Wnt5a is a Notum substrate.

**Figure S3. Evolutionary conservation of Notum proteins from human, mouse, frog, fish, fly and planarian. Related to Figure 4.**

(A) ClustalW alignment of Notum proteins computed by AlignX (VectorNTI). Black, grey, and light grey represent identical, conservative, and similar amino acid residues, respectively. Position of the Notum S239A catalytic mutant is shown above the

alignment with a red S in the GxSxG motif. Sources for alignment: Human (*Homo sapiens*) NP\_848588.3; Mouse (*Mus musculus*) NP\_780472.3; *X.trop* (*Xenopus (Silurana) tropicalis*) Notum NP\_001120228.2 and Notum2 XP\_002932265.2; Fish (Zebrafish *Danio rerio*) Notum1a NP\_001155126.1 and Notum2 XP\_694400.2; Fly (*Drosophila melanogaster*) NP\_730096.2 and Planarian (*Schmidtea mediterranea*) AEF01556.1. Annotated full-length Notum sequences were unavailable for *X.laevis* (*Xenopus laevis*) and were deduced from the *Xenopus laevis* v7.2 genome assembly: Notum (Scaffolds 179377 and 182780), Notum' (Scaffold 122810) and Notum2 (Scaffold 9994). Fish (Zebrafish *Danio rerio*) Notum1b NP\_001002644.1 encodes a truncated 139 amino acid protein lacking the catalytic residues for Notum function and was omitted from the alignment. The gene duplication producing Notum1a and Notum1b is restricted to fish lineages and is separate from the *Xenopus laevis* allopolyploidization event that produced Notum and Notum'. At this time only the *Xenopus* Notum gene is annotated on Xenbase: *X. tropicalis* XB-GENE-996986 and *X. laevis* XB-GENE-996989.

(B) Notum protein phylogenetic tree generated by MegAlign (DNASTAR Lasergene). Straight branched cladogram distances reflect the amino acid substitutions from the ClustalW alignment.

**Figure S4. Characterization of *Xenopus laevis* Notum and Notum'. Related to Figure 5.**

(A) *Xenopus laevis* Notum (*xNotum*) and Notum' (*xNotum'*), like mouse Notum (*mNotum*), inhibited *Wnt3a*-induced TOPFLASH. Error bars represent SD of triplicated experiments.

(B) *xNotum* inhibited *Xnr3* induction by *Wnt8* in animal pole explants. Two doses of *xNotum* mRNA were used.

(C) The Wnt3a protein modified by mouse Notum or xNotum or xNotum' became hydrophilic in the Triton X-114 detergent-aqueous phase separation assay.

(D) xNotum and xNotum', like mNotum, diminished Wnt3a acylation when each was coexpressed with *Wnt3a* in HEK293T cells.

**Figure S5. Notum depletion reduces head development and anterior neural marker expression but does not affect Organizer marker expression. Related to Figure 5.**

(A) Anterior deficiency caused by the *Notum* MOs was rescued (over-rescued) by coexpression of *Dkk1* mRNA.

(B and C) Anterior deficiency caused by the *Notum* MOs was rescued (over-rescued) by co-injection of a  $\beta$ -catenin MO. The *Notum* MOs and/or the  $\beta$ -catenin MO were/was injected into the two A1 blastomeres at the 32-cell stage. Note that depletion of  $\beta$ -catenin at this stage caused enlarged head as reported (Heasman et al., 2000; Kim et al., 2013).

(D) The *Notum* MOs caused decreased expression of *Sox2* and *XAG* at stage 23, and expression of these markers was rescued by coexpression of *mNotum*, but not *Notum(S239A)*, mRNA. Anterior and ventro-anterior views were shown for *Sox2* and *XAG*, respectively. See also Table S2.

(E) RT-PCR revealed that expression of anterior neural and pan neural markers was decreased in Notum-depleted embryos, and was rescued by co-injection of *mNotum*, but not *Notum(S239A)*, mRNA. Expression of *Hbox6*, a posterior neural marker, was unaffected by Notum depletion. *XAG*, a cement gland marker; *Bf1* and *Pax6*, anterior neural markers; *Krox20*, a hindbrain marker; *Hbox6*, a posterior neural marker; *Sox2*, a pan-neural marker; *ODC*, a loading control.

(F) The *Notum* MOs did not affect expression of head organizer markers, *Chordin* and *Gsc*, or dorsal markers, *Xnot* and *Xnr3*, examined at the stage 10.5. See also Table S3.



Dorsal mesoderm is regulated by Wnt signaling, but why it is unaffected by Notum depletion? We think that any of following possibilities may account, in full or a part, for this observation: i) Notum action in dorsal mesoderm may be redundant with other Wnt antagonists expressed there, such as Tiki1 and Dkk1; ii) Notum produced in ectoderm may have limited diffusion ranges; iii) Notum may have Wnt-specificity that is yet to be understood, i.e., it may not inactivate some of the Wnts involved in dorsal mesoderm development; and iv) there may exist unknown negative regulators of Notum in dorsal mesoderm.

**Figure S6. Notum is required for neural induction by Noggin, but is not required for Noggin or Chordin to antagonize BMP signaling. Related to Figure 6.**

(A) Neural marker induction by the Noggin protein was suppressed by the *Notum* MOs in the animal pole explants, and was rescued by co-injection of *mNotum*, but not *Notum(S239A)*, mRNA. *XAG*, a cement gland marker; *Bf1* and *Pax6*, anterior neural markers; *Sox2*, a pan-neural marker; *N-tubulin*, a neuronal marker; *M-Actin*, a mesodermal marker; *ODC*, a loading control.

(B) The *Notum* MOs did not affect *Chordin* or Noggin activity in antagonizing *BMP4* induction of *Vent2* expression in animal pole explants.

**Table S1. Statistics for Figure 5F.**

| Embryos displaying the described changes in marker gene expression |      |                |         |     |           |                |         |      |                  |                |         |      |                 |                |         |      |
|--------------------------------------------------------------------|------|----------------|---------|-----|-----------|----------------|---------|------|------------------|----------------|---------|------|-----------------|----------------|---------|------|
| Marker                                                             | CoMO |                |         |     | Notum MOs |                |         |      | Notum MOs+mNotum |                |         |      | Notum MOs+S239A |                |         |      |
|                                                                    | n    | Percentage (%) |         |     | n         | Percentage (%) |         |      | n                | Percentage (%) |         |      | n               | Percentage (%) |         |      |
|                                                                    |      | Absent         | Reduced | NC* |           | Absent         | Reduced | NC*  |                  | Absent         | Reduced | NC*  |                 | Absent         | Reduced | NC*  |
| <i>Bf1</i>                                                         | 81   | 0              | 0       | 100 | 54        | 5.6            | 64.8    | 29.6 | 31               | 0              | 32.3    | 67.7 | 33              | 3              | 78.8    | 18.2 |
| <i>Otx2</i>                                                        | 32   | 0              | 0       | 100 | 24        | 8.3            | 62.5    | 29.2 | 27               | 0              | 33.3    | 66.7 | 26              | 3.8            | 57.7    | 38.5 |
| <i>Krox20</i>                                                      | 107  | 0              | 0       | 100 | 78        | 1.3            | 61.5    | 37.2 | 58               | 0              | 31      | 69   | 59              | 3.4            | 66.1    | 30.5 |

\* NC = No Change

**Table S2. Statistics for Figure S5D. Related to Figure 5.**

| Embryos displaying the described changes in marker gene expression |      |                |         |     |           |                |         |      |                  |                |         |      |                 |                |         |      |
|--------------------------------------------------------------------|------|----------------|---------|-----|-----------|----------------|---------|------|------------------|----------------|---------|------|-----------------|----------------|---------|------|
| Marker                                                             | CoMO |                |         |     | Notum MOs |                |         |      | Notum MOs+mNotum |                |         |      | Notum MOs+S239A |                |         |      |
|                                                                    | n    | Percentage (%) |         |     | n         | Percentage (%) |         |      | n                | Percentage (%) |         |      | n               | Percentage (%) |         |      |
|                                                                    |      | Absent         | Reduced | NC* |           | Absent         | Reduced | NC*  |                  | Absent         | Reduced | NC*  |                 | Absent         | Reduced | NC*  |
| <i>Sox2</i>                                                        | 12   | 0              | 0       | 100 | 17        | 52.9           | 35.3    | 11.8 | 14               | 7.1            | 28.6    | 64.3 | 14              | 57.1           | 35.8    | 7.1  |
| <i>XAG</i>                                                         | 14   | 0              | 0       | 100 | 14        | 28.6           | 57.1    | 14.3 | 10               | 0              | 30      | 70   | 7               | 28.6           | 42.8    | 28.6 |

\* NC = No Change

**Table S3. Statistics for Figure S5F. Related to Figure 5.**

| Embryos displaying the described changes in marker gene expression |      |                |         |           |                |         |                  |                |         |
|--------------------------------------------------------------------|------|----------------|---------|-----------|----------------|---------|------------------|----------------|---------|
| Marker                                                             | CoMO |                |         | Notum MOs |                |         | Notum MOs+mNotum |                |         |
|                                                                    | n    | Percentage (%) |         | n         | Percentage (%) |         | n                | Percentage (%) |         |
|                                                                    |      | NC*            | Reduced |           | NC*            | Reduced |                  | NC*            | Reduced |
| <i>Chordin</i>                                                     | 29   | 97             | 3       | 30        | 84             | 16      | 29               | 87             | 13      |
| <i>Gsc</i>                                                         | 31   | 91             | 9       | 29        | 87             | 13      | 32               | 88             | 12      |
| <i>Xnot</i>                                                        | 26   | 100            | 0       | 25        | 100            | 0       | 25               | 100            | 0       |
| <i>Xnr3</i>                                                        | 15   | 93             | 7       | 14        | 86             | 14      | 16               | 87             | 13      |

\* NC = No Change

**Table S4. Statistics for Figure 6A.**

| Embryos displaying the described changes in marker gene expression |      |                |            |           |                |           |                  |                |             |                 |                |             |
|--------------------------------------------------------------------|------|----------------|------------|-----------|----------------|-----------|------------------|----------------|-------------|-----------------|----------------|-------------|
| Marker                                                             | CoMO |                |            | Notum MOs |                |           | Notum MOs+mNotum |                |             | Notum MOs+S239A |                |             |
|                                                                    | n    | Percentage (%) |            | n         | Percentage (%) |           | n                | Percentage (%) |             | n               | Percentage (%) |             |
|                                                                    |      | NC*            | Affected   |           | NC*            | Affected  |                  | NC*            | Affected    |                 | NC*            | Affected    |
| <b>Sox2</b>                                                        | 32   | 96.9           | 3.1 (down) | 30        | 30             | 70 (down) | 28               | 67.9           | 32.1 (down) | 33              | 30.3           | 69.7 (down) |
| <b>Keratin</b>                                                     | 37   | 100            | 0          | 36        | 30.6           | 69.4 (up) | 37               | 75.7           | 24.3 (up)   | 28              | 28.6           | 71.4 (up)   |

\* NC = No Change

## SUPPLEMENTAL EXPERIMENTAL PROCEDURES

### Cell culture, transfection and reporter assay

HEK293T (from ATCC) and mouse embryonic fibroblasts (MEFs) (isolated from E13-14 mouse embryos and immortalized by the SV40 T antigen) were maintained in Dulbecco's modified Eagle's medium (DMEM; Invitrogen) supplemented with 10% fetal bovine serum (FBS) and 1% penicillin-streptomycin-glutamine (Invitrogen). Lipofectamine 2000 (Invitrogen) was used for transfections. TOPFLASH reporter assay was performed as previously described (Zhang et al., 2012).

### Antibodies and immunoblotting

Antibodies were used according to manufacturers' instructions. Immunoblotting was performed as previously described (Zhang et al., 2012). The rabbit monoclonal anti-Wnt3a (#2721, 1:1000), anti-HA (#3724, 1:1000), anti-Wnt5a (#2530, 1:1000), anti-FLAG (#8146, 1:2000), anti-Dvl2 (#3224, 1:1000), and anti-pLRP6 (S1490, #2568, 1:1000) were from Cell Signaling. Rabbit polyclonal anti-Notum (HPA023041, 1:1000) was from ATLAS Antibodies. Mouse monoclonal anti-HA (12CA5) was from Roche. Anti-FLAG M2 (A2220) and anti-HA (A2095) Affinity gels were from Sigma.

## RT-PCR primers and Morpholinos

RT-PCR primers for *Xenopus laevis* Notum: Forward, 5'-AAGAGAATCCGCACTGGTGG-3' (Notum), 5'-AAGAGAATCCTCACTGGTGG-3' (Notum'); Reverse, 5'-TCTAGGGAAGGGACTGGACG-3' (Notum and Notum'). The MO sequences: xNotum MO, 5'-GTGCTCAGTGCCTGGCATGGCTGGG-3'; xNotum', 5'-TGAAGGGTGGTGGCTTGGCATGGCTG-3'; standard control MO: 5'-CCTCTTACCTCAGTTACAATTTATA-3' (Gene Tools, LLC).

## SUPPLEMENTAL REFERENCES

De Cat, B., Muyldermans, S.Y., Coomans, C., Degeest, G., Vanderschueren, B., Creemers, J., Biemar, F., Peers, B., and David, G. (2003). Processing by proprotein convertases is required for glypican-3 modulation of cell survival, Wnt signaling, and gastrulation movements. *The Journal of cell biology* 163, 625-635.

Gonzalez, A.D., Kaya, M., Shi, W., Song, H., Testa, J.R., Penn, L.Z., and Filmus, J. (1998). OCI-5/GPC3, a glypican encoded by a gene that is mutated in the Simpson-Golabi-Behmel overgrowth syndrome, induces apoptosis in a cell line-specific manner. *The Journal of cell biology* 141, 1407-1414.

Kim, S.E., Huang, H., Zhao, M., Zhang, X., Zhang, A., Semonov, M.V., MacDonald, B.T., Garcia Abreu, J., Peng, L., and He, X. (2013). Wnt stabilization of beta-catenin reveals principles for morphogen receptor-scaffold assemblies. *Science* 340, 867-870.
